# THE LINKAGE MAP OF *SALMONELLA TYPHIMURIUM*<sup>1</sup>

KENNETH E. SANDERSON AND M. DEMEREC

*Biology Department, Brookhaven National Laboratory, Upton, New York*

Received December 29, 1964

THREE methods are available for determining long sections of the linkage map of the *Salmonella typhimurium* chromosome: interrupted conjugation (WOLLMAN, JACOB and HAYES 1956), *col*-factor-mediated conjugation (SMITH and STOCKER 1962) and hybridization (DEMEREC 1964; DEMEREC and OHTA 1964). The first method, usually referred to here as kinetic studies, provides the main body of data summarized in this report, whose primary objective is to present a genetic map incorporating all the information we now have about the positions of different gene loci.

*S. typhimurium* has proved as amenable to analysis by conjugation as *Escherichia coli* K-12, thanks to a method that employs Millipore filters as a solid medium on which effective contact can be made between mating pairs. Kinetic studies made with five Hfr strains having different points of origin are reported here.

## MATERIALS AND METHODS

The minimal medium contained: K<sub>2</sub>HPO<sub>4</sub>, 10.5 g; KH<sub>2</sub>PO<sub>4</sub>, 4.5 g; MgSO<sub>4</sub>, 0.05 g; (NH<sub>4</sub>)<sub>2</sub>SO<sub>4</sub>, 1.0 g; sodium citrate, 0.47 g; glucose, 4.0 g; distilled water, 1000 ml. In minimal medium supplemented with amino acids, purines or pyrimidines, the concentration of supplement was 15 µg/ml; in minimal medium supplemented with vitamins, the concentration was 1.5 µg/ml. Cells were mated in Difco Bacto-Nutrient broth.

Four of the Hfr strains originated from an F<sup>+</sup> strain of *S. typhimurium* LT-2 that carries a sex factor from *E. coli* K-12 (ZINDER 1960b); two were isolated by ZINDER, and two in this laboratory. The fifth strain, a donor strain of *S. abony*, was derived by MÄKELÄ (1963). Properties of the five strains are shown in Table 1.

Almost all the recipient strains were derivatives of *S. typhimurium* LT-2 from the stock collection of M. DEMEREC. Several others were isolated by the authors after treatment with

TABLE 1  
*Donor strains of Salmonella*

| Donor symbol | Stock No. | Species                    | Source    | Genotype             | Order of injection             |
|--------------|-----------|----------------------------|-----------|----------------------|--------------------------------|
| HfrA         | SR305     | <i>S. typhimurium</i> LT-2 | ZINDER    | <i>his-23 gal-50</i> | O- <i>pdx-ilv-thr-try-aroB</i> |
| HfrB2        | SU422     | <i>S. typhimurium</i> LT-2 | SANDERSON | <i>metA22 xyl-1</i>  | O- <i>his-str-thr-ry</i>       |
| HfrB3        | SU436     | <i>S. typhimurium</i> LT-2 | SANDERSON | <i>his-23 gal-50</i> | O- <i>argE-his-try-argG</i>    |
|              | SR315     | <i>S. typhimurium</i> LT-2 | ZINDER    | <i>leu-256</i>       | O- <i>cysB-his-purC</i>        |
|              | SW1452    | <i>S. abony</i> SW803      | MÄKELÄ    | <i>try-291</i>       | O- <i>metA-ilv-str-purA</i>    |

<sup>1</sup> Research carried out at Brookhaven National Laboratory under the auspices of the U. S. Atomic Energy Commission.

diethyl sulfate designed to obtain polymutant combinations. A few strains were acquired from other laboratories.

These donor and recipient strains mate well when mixed on a solid medium. Effective contacts are rarely formed between male and female cells in a liquid medium; but, following up the report of MATNEY and ACHENBACH (1962) on the use of Millipore filters to increase the fertility of donor strains in *E. coli*, we have found that *S. typhimurium* donors will readily form effective contacts if the mating is started on a Millipore filter.

Overnight broth cultures of donor and recipient strains were diluted 1/40 in broth and grown to mid-log phase on a shaker at 37°C. About  $2 \times 10^8$  donor cells and  $10^9$  recipient cells were mixed on a Millipore filter (25 mm diameter, 0.45  $\mu$  pore size), the liquid was drawn through the filter under vacuum and the filter was placed on a plate of nutrient soft agar (0.75%) at 37°C for 5 minutes to permit the formation of effective contacts. The Millipore filter was then placed in 16 ml of broth at 37°C in a 250 ml Erlenmeyer flask, the cells were suspended in the broth, and mating was continued with gentle agitation. Gentle washing into broth, gentle agitation and careful pipetting do not separate mated pairs.

For kinetic analysis, time zero was taken as the time at which the cells were drawn onto the Millipore filter. At various time intervals, samples of the mating mixture were diluted in broth, and the mated pairs were separated by shaking for one minute with a vigorous shaking device. (A Fisher Mini-Shaker is used in this laboratory.) Samples were pipetted into 2.0 ml of soft minimal agar (0.75%), which was maintained at 45°C and then poured onto minimal agar plates.

Growth of the donor strains and plate mating were prevented by omitting from the minimal medium the supplements required by the auxotrophic donor strains. In several cases, a streptomycin-resistant mutant of the recipient strain was isolated, and streptomycin (1200  $\mu$ g/ml) was included in the minimal medium to eliminate the streptomycin-sensitive donor cells.

New donor strains were isolated by the methods described by TAYLOR and ADELBERG (1960).

## RESULTS

*Isolation of Hfr strains:* Eighty-four isolates with Hfr properties were obtained from the ultraviolet-irradiated *S. typhimurium* F<sup>+</sup> strain. Of these, 81 had the point of origin in the same region as HfrA and could not be distinguished from it. The frequency of recurrence of HfrA among F<sup>+</sup> bacteria surviving irradiation was 1 to 5%. Of the three other Hfr strains, two (HfrB2 and HfrB3) served as donors in the experiments reported here (see Table 1).

*Kinetic analysis:* The point of origin of an Hfr is the first portion of the chromosome to be donated to a recipient strain. On a linkage map, the distance from this point to any gene locus is expressed as the amount of time required for that locus to begin to enter the recipient ("time of entry"). The time of entry is determined by an interrupted-mating experiment, and the distance is expressed in minutes. Data of a representative experiment are shown in Figure 1. The explanation of gene symbols is found in Table 7. In this cross the recipient parent (F<sup>-</sup>) was *tyr-3 gly-18 metA*<sup>+</sup> and the donor parent was HfrB2 *gly*<sup>+</sup> *tyr*<sup>+</sup> *metA22*. After mating, the cells were plated on minimal medium supplemented with either glycine or tyrosine. Methionine was omitted to prevent growth of the donor strain. Extrapolation of the curves for *gly*<sup>+</sup> and *tyr*<sup>+</sup> recombinants to time zero indicated that the *gly*<sup>+</sup> locus from the donor parent begins to enter the recipient cells at 31 minutes, and that the *tyr*<sup>+</sup> locus begins to enter 4 minutes later. Therefore, the order of genes and the distances between them on the linkage map may be written as O-31-*gly*-4-*tyr*.

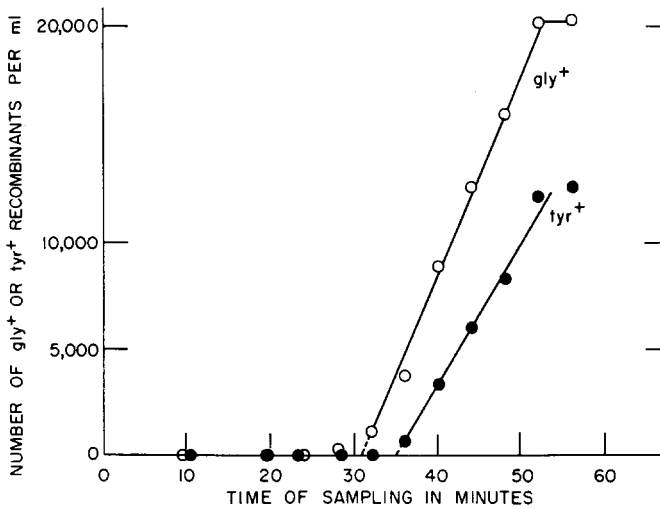

FIGURE 1.—Kinetics of chromosome transfer of donor strain HfrB2.

Data from crosses made with different recipient strains are presented in Tables 2 to 6. The points of origin and the orientation of the five donor strains considered are shown in Figure 2. Each table lists all the kinetic data that have been collected with one of the Hfr strains. Data marked with the same superscript letter are the results of one cross with a multiply auxotrophic recipient strain. In Table 2, for example, cross "f" showed the time of entry of *argF* to be 15 minutes, that of *thi* 17 minutes. The order of these two loci, and the interval between them on the

TABLE 2

*Times of entry, in minutes, of markers transferred by HfrA*

| <i>pdx</i>      | <i>thrE</i>     | <i>metE</i>     | <i>ilv</i>     | <i>rha</i>      | <i>asp</i>      | <i>metB</i> | <i>argF</i>     | <i>metA</i>     | <i>purD</i>     | <i>thi</i>      | <i>purA</i>     | <i>pyrB</i> | <i>serB</i>     | <i>thr</i>      | <i>pyrA</i>     |
|-----------------|-----------------|-----------------|----------------|-----------------|-----------------|-------------|-----------------|-----------------|-----------------|-----------------|-----------------|-------------|-----------------|-----------------|-----------------|
| ..              | ..              | ..              | 9 <sup>b</sup> | ..              | 13 <sup>e</sup> | ..          | 15 <sup>f</sup> | 15 <sup>b</sup> | ..              | 17 <sup>f</sup> | ..              | ..          | ..              | 27 <sup>a</sup> | ..              |
| ..              | ..              | ..              | 8 <sup>c</sup> | ..              | ..              | ..          | ..              | 15 <sup>c</sup> | ..              | ..              | ..              | ..          | 25 <sup>i</sup> | 26 <sup>i</sup> | ..              |
| ..              | ..              | ..              | ..             | ..              | ..              | ..          | ..              | ..              | ..              | ..              | ..              | ..          | 24 <sup>h</sup> | 25 <sup>h</sup> | ..              |
| 8               | 7               | 7               | ..             | 13              | 13              | 14          | ..              | ..              | 15              | ..              | 22              | 24          | ..              | ..              | 28              |
| 6               | ..              | 7               | ..             | ..              | ..              | 14          | ..              | ..              | ..              | ..              | ..              | ..          | ..              | ..              | ..              |
| 7               | 7               | 7               | 8              | 13              | 13              | 14          | 15              | 15              | 15              | 17              | 22              | 24          | 24              | 26              | 28              |
| <i>ara</i>      | <i>leu</i>      | <i>argD</i>     | <i>pan</i>     | <i>proAB</i>    | <i>proC</i>     | <i>nic</i>  | <i>purE</i>     | <i>asc</i>      | <i>glt</i>      | <i>pyrC</i>     | <i>purB</i>     | <i>aroE</i> | <i>cysB</i>     | <i>try</i>      | <i>his</i>      |
| 28 <sup>e</sup> | 29 <sup>a</sup> | ..              | ..             | 39 <sup>a</sup> | ..              | ..          | ..              | ..              | 63 <sup>l</sup> | 67 <sup>a</sup> | ..              | ..          | 78 <sup>l</sup> | 78 <sup>a</sup> | ..              |
| 29 <sup>i</sup> | 29 <sup>i</sup> | ..              | ..             | 36 <sup>g</sup> | ..              | ..          | 43 <sup>g</sup> | ..              | ..              | ..              | ..              | ..          | 77 <sup>d</sup> | 77 <sup>d</sup> | 86 <sup>d</sup> |
| ..              | 28 <sup>k</sup> | ..              | ..             | 37 <sup>h</sup> | ..              | ..          | 46 <sup>h</sup> | ..              | ..              | 65 <sup>m</sup> | 68 <sup>m</sup> | ..          | ..              | 77 <sup>m</sup> | ..              |
| 30              | 30              | 32 <sup>n</sup> | ..             | 40 <sup>n</sup> | ..              | 49          | ..              | 45              | ..              | 68              | ..              | 68          | ..              | 76 <sup>o</sup> | 88 <sup>o</sup> |
| ..              | ..              | ..              | 34             | 37              | 36              | 45          | ..              | ..              | ..              | 67              | ..              | ..          | ..              | ..              | ..              |
| 29              | 29              | 32              | 34             | 37              | 36              | 47          | 44              | 45              | 63              | 67              | 68              | 68          | 77              | 77              | 87              |

Data carrying the same superscript letter were obtained from a single cross with a multiply auxotrophic recipient.

TABLE 3

*Times of entry, in minutes, of markers transferred by HfrB2*

| <i>tre</i> | <i>his</i>      | <i>metG</i>     | <i>aroD</i> | <i>purG</i> | <i>cysA</i>     | <i>gly</i>      | <i>purC</i>     | <i>tyr</i>      | <i>phe</i>      | <i>cysC</i>     | <i>serA</i>     | <i>argE</i>     | <i>argG</i> | <i>cysG</i> | <i>aroC</i>     | <i>aroB</i> |
|------------|-----------------|-----------------|-------------|-------------|-----------------|-----------------|-----------------|-----------------|-----------------|-----------------|-----------------|-----------------|-------------|-------------|-----------------|-------------|
| ..         | 15 <sup>a</sup> | ..              | ..          | ..          | 28 <sup>c</sup> | 30 <sup>e</sup> | 30 <sup>a</sup> | 35 <sup>e</sup> | 38 <sup>c</sup> | ..              | ..              | ..              | ..          | ..          | ..              | ..          |
| ..         | 15 <sup>b</sup> | ..              | ..          | ..          | 29 <sup>d</sup> | 31 <sup>f</sup> | 30 <sup>b</sup> | 35 <sup>f</sup> | 39 <sup>d</sup> | 39 <sup>h</sup> | 45 <sup>h</sup> | ..              | ..          | ..          | ..              | ..          |
| ..         | 5 <sup>m</sup>  | 15 <sup>m</sup> | ..          | ..          | ..              | ..              | ..              | 33 <sup>g</sup> | ..              | 40 <sup>g</sup> | 45 <sup>k</sup> | ..              | ..          | ..          | 66 <sup>k</sup> | ..          |
| ..         | 8               | ..              | ..          | ..          | ..              | ..              | ..              | 32 <sup>i</sup> | ..              | ..              | 43 <sup>i</sup> | 52 <sup>i</sup> | ..          | ..          | ..              | ..          |
| ..         | 15 <sup>n</sup> | 17 <sup>n</sup> | ..          | ..          | ..              | ..              | 32 <sup>j</sup> | 36 <sup>j</sup> | ..              | ..              | ..              | 53 <sup>j</sup> | ..          | ..          | ..              | ..          |
| ..         | ..              | 14              | ..          | ..          | 28 <sup>l</sup> | ..              | 34 <sup>l</sup> | ..              | ..              | ..              | ..              | ..              | ..          | ..          | ..              | ..          |
| ..         | ..              | 14              | 23          | 28          | ..              | 29              | ..              | ..              | ..              | 40              | 46              | ..              | 58          | 59          | 68              | 68          |
| 6          | 15              | 17*             | 23          | 28          | 28              | 30              | 31              | 34              | 38              | 40              | 45              | 52              | 58          | 59          | 67              | 68          |

Data carrying the same superscript letter were obtained from a single cross with a multiply auxotrophic recipient.  
 \* Cross "14n", followed by analysis of the recombinants for unselected markers, clearly showed that *metG* is distal to *his*. Therefore, the two 14-minute times are not considered.

TABLE 4

*Times of entry, in minutes, of markers transferred by HfrB3*

| <i>argE</i>     | <i>metC</i> | <i>lysA</i> | <i>serA</i>     | <i>thy</i>      | <i>argB</i>     | <i>cysC</i>     | <i>tyr</i>      | <i>purG</i>     | <i>cysA</i> | <i>strB</i> | <i>aroD</i> | <i>try</i> |
|-----------------|-------------|-------------|-----------------|-----------------|-----------------|-----------------|-----------------|-----------------|-------------|-------------|-------------|------------|
| 13 <sup>a</sup> | ..          | ..          | 18 <sup>a</sup> | ..              | 23 <sup>c</sup> | 24 <sup>c</sup> | 30 <sup>a</sup> | ..              | ..          | ..          | ..          | ..         |
| ..              | ..          | ..          | 18 <sup>b</sup> | ..              | 22 <sup>d</sup> | 23 <sup>d</sup> | 29 <sup>b</sup> | ..              | ..          | ..          | ..          | ..         |
| 12 <sup>g</sup> | ..          | ..          | ..              | 19 <sup>g</sup> | ..              | 23 <sup>e</sup> | 30 <sup>e</sup> | ..              | ..          | ..          | ..          | ..         |
| ..              | ..          | ..          | ..              | 20 <sup>h</sup> | 20 <sup>h</sup> | ..              | 28 <sup>f</sup> | 32 <sup>f</sup> | ..          | ..          | ..          | ..         |
| ..              | 13          | 16          | ..              | ..              | ..              | ..              | ..              | ..              | 35          | 36          | 39          | 58         |
| ..              | 13          | ..          | ..              | ..              | ..              | ..              | ..              | ..              | ..          | ..          | ..          | ..         |
| 13              | 13          | 16          | 18              | 20              | 22              | 23              | 29              | 32              | 35          | 36          | 39          | 58         |

Data carrying the same superscript letter were obtained from a single cross with a multiply auxotrophic recipient.

TABLE 5

*Times of entry, in minutes, of markers transferred by SR315*

| <i>cysB</i>    | <i>try</i>      | <i>his</i>      | <i>purC</i> |
|----------------|-----------------|-----------------|-------------|
| ..             | 10 <sup>a</sup> | 23 <sup>a</sup> | ..          |
| 9 <sup>b</sup> | ..              | 22 <sup>b</sup> | ..          |
| ..             | ..              | ..              | 35          |
| 9              | 10              | 22              | 35          |

Data carrying the same superscript letter were obtained from a single cross with a multiply auxotrophic recipient.

linkage map, may be considered correct, with a possible error of 1 to 2 minutes. However, data with different superscript markings, or with none, are from independent experiments. In such experiments the relative order of loci can be determined only if the average interval between them exceeds 3 to 4 minutes. Thus

TABLE 6

*Times of entry, in minutes, of markers transferred by SW1452*

| <i>metA</i>     | <i>ile</i>      | <i>aroC</i> | <i>xyl</i>      |
|-----------------|-----------------|-------------|-----------------|
| ..              | 19 <sup>a</sup> | ..          | 30 <sup>a</sup> |
| ..              | 18 <sup>b</sup> | ..          | 27 <sup>b</sup> |
| 12 <sup>c</sup> | ..              | ..          | 26 <sup>c</sup> |
| ..              | ..              | 22          | ..              |
| ..              | ..              | 25          | ..              |
| 12              | 18              | 23          | 27              |

Data carrying the same superscript letter were obtained from a single cross with a multiply auxotrophic recipient.

the results of the "f" cross indicate that *thi* is distal to *argF*, but its location with respect to *metA* and *purD* is not definite.

The order of two closely linked loci may be resolved in tests in which the times of entry of both loci are measured in the same experiment and the recombinants are then analyzed for the unselected marker. For example, a strain with mutations in the loci *serB* and *thrA*, previously shown to be carried in the same transducing fragment (GLANVILLE and DEMEREC 1960) was crossed with HfrA *serB*<sup>+</sup> *thrA*<sup>+</sup>. Recombinants for *serB*<sup>+</sup> and *thrA*<sup>+</sup> were independently selected in an interrupted-mating experiment. The times of entry were 24 minutes for *serB* and 24.5 minutes for *thrA*. Since these values are too close for reliable determination of the order of the two loci, recombinants selected for *serB*<sup>+</sup> or *thrA*<sup>+</sup> were analyzed for the unselected locus. Among *serB*<sup>+</sup> recombinants selected after 23 minutes of mating, only 61 of 126 (48%) were *thrA*<sup>+</sup>, whereas among those selected after 35 minutes, 80 of 82 (98%) were *thrA*<sup>+</sup>. All *thrA*<sup>+</sup> recombinants, however, whether selected after 23 minutes (67) or after 35 minutes (99), were *serB*<sup>+</sup>. This result shows that *serB* is proximal to *thrA*. In recombinants selected for *serB*<sup>+</sup> after 23 minutes, early interruption of mating prevents the entry of *thrA*<sup>+</sup> into the merozygote, giving rise to a low frequency (48%) of *thrA*<sup>+</sup>; but by 35 minutes most merozygotes have received donor alleles for both loci. Therefore, the order of loci suggested by the kinetic data, O-*serB*-*thrA*, is confirmed.

The data of Tables 2 to 6 permit the construction of five linear linkage maps based on the results obtained with the five donor strains. The map compiled by experiments with a single donor strain represents a fraction of the total genome varying from almost one half for HfrA and HfrB2, to about one eighth for SW1452. These independent maps, overlapping one another, make it possible to construct an overall linkage map. In order to fit the five partial maps together, it is necessary to show the final map as a closed circle, like the linkage map of *E. coli* (JACOB and WOLLMAN 1961; TAYLOR and THOMAN 1964).

The linkage map of *S. typhimurium*, 138 minutes in length, begins numbering at *serB* and proceeds clockwise through *pyrB* (Figure 2). A list of all loci on the map is presented in Table 7.

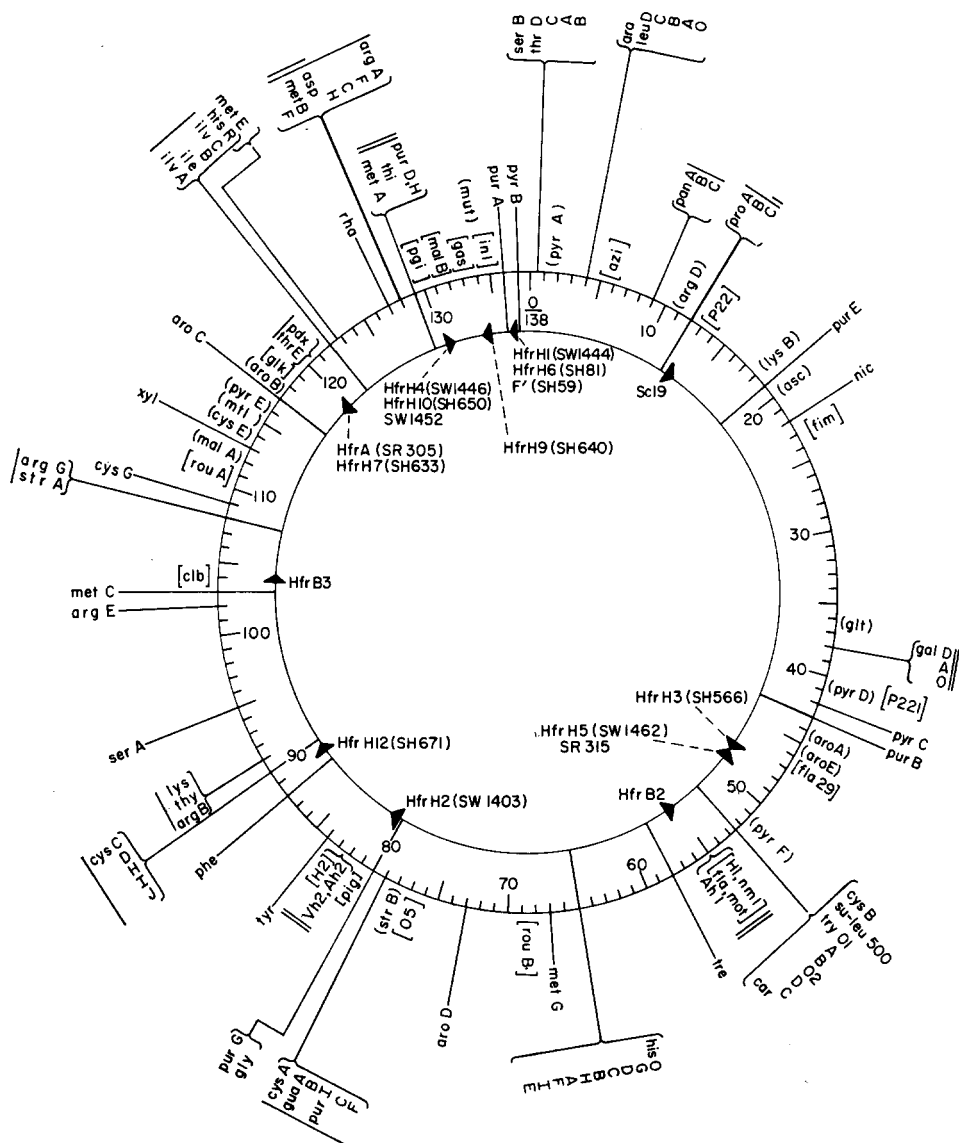

#### LINKAGE MAP OF SALMONELLA TYPHIMURIUM

- } TRANSDUCING FRAGMENT; GENE ORDER & ORIENTATION KNOWN
- | } TRANSDUCING FRAGMENT; GENE ORDER KNOWN, ORIENTATION NOT KNOWN
- || } TRANSDUCING FRAGMENT; NEITHER GENE ORDER NOR ORIENTATION KNOWN
- ( ) POSITION KNOWN APPROXIMATELY
- [ ] MAPPED WITH *col*-FACTOR MEDIATED CONJUGATION

FIGURE 2.—The linkage map of *S. typhimurium*. This map is constructed from the partial maps derived from Tables 2-6, and from other sources given in Table 7. The map is marked in one-minute intervals. Gene loci are shown on the outside circle, the point of entry and direction of injection of donor strains are shown on the inside. HfrA, HfrB2, HfrB3, and SR315 are donor strains of *S. typhimurium*, Sc19 is a *S. typhimurium* × *E. coli* hybrid, and all other donors shown on the map are *S. abony* (MÄKELÄ 1963, unpublished). The location of loci marked by square brackets, determined approximately by *col*-factor-mediated conjugation only, is not known with respect to loci mapped by kinetic studies only. Sixteen other loci shown on the map, which are also listed in the text, have been mapped by *col*-factor-mediated conjugation (STOCKER, SMITH, and SUBBAIAH, 1963) as well as by kinetic studies, and the order determined for these loci by the two methods is identical.

TABLE 7

List of genetic markers of *S. typhimurium*

| Genetic symbols     | Activity                                                                                                         | Homologous              | References |                 | Map position (min) |
|---------------------|------------------------------------------------------------------------------------------------------------------|-------------------------|------------|-----------------|--------------------|
|                     |                                                                                                                  | locus in <i>E. coli</i> | Genetics   | Biochemistry    |                    |
| <u>Ah1</u>          | synthesis of flagella of phase 1                                                                                 |                         | 36,37      | --              | 55                 |
| <u>Ah2</u>          | synthesis of flagella of phase 2                                                                                 |                         | 36,37      | --              | 82                 |
| <u>ara</u>          | arabinose utilization                                                                                            | <u>ara</u>              | 15         | 42*             | 4                  |
| <u>argB</u>         | arginine N-acetylglutamate synthetase                                                                            | <u>argB</u>             | 16         | 75*             | 91                 |
| <u>argC</u>         | arginine N-acetyl-γ-glutamokinase                                                                                | <u>argC</u>             | 16         | 75*             | 128                |
| <u>argH</u>         | arginine N-acetylglutamic-γ-semialdehyde dehydrogenase                                                           | <u>argH</u>             | 16         | 75*             | 128                |
| <u>argO</u>         | arginine acetyl ornithine-δ-transaminase                                                                         | <u>argO</u>             | 16         | 75*             | 108                |
| <u>argA</u>         | arginine acetyl ornithinase                                                                                      | <u>argA</u>             | 16         | 75*             | 128                |
| <u>argD</u>         | arginine ornithine transcarbamylase                                                                              | <u>argD</u>             | 16         | 75*             | 11                 |
| <u>argE</u>         | arginine argininosuccinic acid synthetase                                                                        | <u>argE</u>             | 16         | 75*             | 102                |
| <u>argF</u>         | arginine argininosuccinase                                                                                       | <u>argF</u>             | 16         | 75*             | 128                |
| <u>asp</u>          | aspartate aspartate or glutamate requirement (phosphoenolpyruvic carboxylase) <sup>†</sup>                       |                         | 79         | 73 <sup>†</sup> | 128                |
| <u>aroA,B,C,D,E</u> | aromatic amino acids or vitamins requirement                                                                     | <u>aroA,B,C,D</u>       | 55,19      | --              | 45,73,117          |
| <u>asc</u>          | ascorbate requirement                                                                                            |                         | --         | --              | 20                 |
| <u>azi</u>          | azide resistance                                                                                                 | <u>azi</u>              | 66         | --              | 6                  |
| <u>car</u>          | carbohydrate utilization                                                                                         |                         | 52         | --              | 52                 |
| <u>clb</u>          | cellobiose utilization                                                                                           |                         | 69         | --              | 104                |
| <u>cysA</u>         | cysteine sulfate-thiosulfate permease                                                                            |                         | 51         | 21, 21a         | 79                 |
| <u>cysD</u>         | cysteine adenosine-5'-triphosphate sulfurylase                                                                   | <u>cysD</u>             | 13,51      | 21              | 90                 |
| <u>cysC</u>         | cysteine adenylyl sulfate kinase                                                                                 |                         | 13,51      | 21              | 90                 |
| <u>cysH</u>         | cysteine adenylyl sulfate-3'-phosphate reductase                                                                 |                         | 13,51      | 21,51,60        | 90                 |
| <u>cysJ</u>         | cysteine sulfite reductase (1st step)                                                                            |                         | 13,51      | 21,43,59,60     | 90                 |
| <u>cysC,I</u>       | cysteine sulfite reductase (2nd step)                                                                            |                         | 13,51      | 21,59,60        | 109,90             |
| <u>cysEa</u>        | cysteine sulfide to cysteine                                                                                     |                         | 51         | 21              | 114                |
| <u>cysEb</u>        | cysteine sulfate (thiosulfate) to cysteine (activities <u>cysA-cysEa</u> missing)                                |                         | 51         | 21              | 114                |
| <u>cysEabc</u>      | cysteine sulfate (thiosulfate) to H <sub>2</sub> S (activities <u>cysA-cysD,I</u> missing, <u>cysEa</u> present) | <u>cysB</u>             | 13,51      | 21,43,59,60     | 52                 |
| <u>fin</u>          | fimbriation                                                                                                      |                         | 66         | --              | 23                 |
| <u>fla29</u>        | flagella                                                                                                         |                         | 66,67      | --              | 47                 |
| <u>fla</u>          | flagella                                                                                                         |                         | 66,67      | --              | 55                 |
| <u>galO</u>         | galactose operator                                                                                               | <u>galO</u>             | 24,53      | 24,53           | 38                 |
| <u>galA</u>         | galactose galactokinase                                                                                          | <u>galA</u>             | 24,53      | 24,53           | 38                 |
| <u>galD</u>         | galactose epimerase                                                                                              | <u>galD</u>             | 24,53      | 24,53           | 38                 |
| <u>gac</u>          | gas production during carbohydrate fermentation                                                                  |                         | 66         | --              | 133                |
| <u>glk</u>          | glycerol glycerol kinase                                                                                         |                         | 66         | --              | 119                |
| <u>glv</u>          | glutamate requirement                                                                                            |                         | 79         | --              | 36                 |
| <u>gly</u>          | glycine requirement                                                                                              |                         | 15         | --              | 80                 |
| <u>guaB</u>         | guanine IMP <sup>†</sup> dehydrogenase (IMP to XMP)                                                              | <u>gua</u>              | 29         | --              | 79                 |
| <u>guaA</u>         | guanine XMP aminase (XMP to GMP)                                                                                 | <u>gua</u>              | 18,29      | --              | 79                 |
| <u>h1</u>           | antigen phase 1 flagellar antigen                                                                                |                         | 66,41      | 45a,46a         | 55                 |
| <u>h2</u>           | antigen phase 2 flagellar antigen                                                                                |                         | 66,41      | 45a,46a         | 82                 |
| <u>hisO</u>         | histidine operator                                                                                               |                         | 1,2        | 1,44            | 65                 |
| <u>hisC</u>         | histidine phosphoribosyl-ATP-pyrophosphorylase                                                                   | <u>his</u>              | 1,33       | 1,44            | 65                 |
| <u>hisE</u>         | histidine phosphoribosyl-ATP-pyrophosphohydrolase                                                                |                         | 1,33       | 1,44            | 65                 |
| <u>hisI</u>         | histidine phosphoribosyl-AMP-hydrolase                                                                           |                         | 1,33       | 1,44            | 65                 |
| <u>hisA</u>         | histidine isomerase                                                                                              |                         | 1,33       | 1,44            | 65                 |
| <u>hisF</u>         | histidine amido transferase                                                                                      |                         | 1,33       | 1,44            | 65                 |
| <u>hisF</u>         | histidine cyclase                                                                                                |                         | 1,33       | 1,44            | 65                 |
| <u>hisB</u>         | histidine imidazole glycerol phosphate dehydrase and histidinol phosphatase (bifunctional)                       |                         | 1,33       | 1,44            | 65                 |
| <u>hisC</u>         | histidine imidazole acetyl phosphate transaminase                                                                |                         | 1,33       | 1,44            | 65                 |
| <u>hisD</u>         | histidine histidinol dehydrogenase                                                                               |                         | 1,33       | 1,44            | 65                 |
| <u>hisR</u>         | histidine regulator                                                                                              |                         | 34,57      | 44              | 122                |
| <u>inl</u>          | inositol fermentation                                                                                            |                         | 66         | --              | 135                |

TABLE 7—Continued  
List of genetic markers of *S. typhimurium*

| Genetic symbols  | Activity            | Homologous locus in                                            |                  | References  |              | Map position (min) |
|------------------|---------------------|----------------------------------------------------------------|------------------|-------------|--------------|--------------------|
|                  |                     | <i>E. coli</i>                                                 |                  | Genetics    | Biochemistry |                    |
| <u>ile</u>       | isoleucine          | threonine deaminase                                            | <u>ile</u>       | 3,26        | 76           | 122                |
| <u>ilvA</u>      | isoleucine-valine   | reductoisomerase                                               | <u>ilvA</u>      | 3,26        | 76           | 122                |
| <u>ilvB</u>      | isoleucine-valine   | dehydrase                                                      | <u>ilvB</u>      | 3,26        | 76           | 122                |
| <u>ilvC</u>      | isoleucine-valine   | transaminase                                                   | <u>ilvC</u>      | 3,26        | 76           | 122                |
| <u>leuO</u>      | leucine             | operator                                                       |                  | 52          | --           | 4                  |
| <u>leuA</u>      | leucine             | condensing enzyme                                              | <u>leu</u>       | 46          | 40           | 4                  |
| <u>leuO,D</u>    | leucine             | isomerase                                                      |                  | 46          | 32           | 4                  |
| <u>leuB</u>      | leucine             | dehydrogenase                                                  |                  | 46          | 10           | 4                  |
| <u>lys</u>       | lysine              | requirement                                                    | <u>lys</u>       | --          | --           | 91                 |
| <u>lysB</u>      | lysine              | lysine + methionine requirement                                | <u>lys + met</u> | --          | 4*           | 18                 |
| <u>malA</u>      | maltose             | utilization                                                    | <u>malA</u>      | --          | --           | 112                |
| <u>malB</u>      | maltose             | utilization                                                    | <u>malB</u>      | 66,19       | --           | 132                |
| <u>metA</u>      | methionine          | homoserine + succinate to o-succinyl homoserine                | <u>metA</u>      | 61,62,19    | --           | 129                |
| <u>metB</u>      | methionine          | o-succinyl homoserine + cysteine to cystathionine              | <u>metB</u>      | 61,62,19    | --           | 128                |
| <u>metC</u>      | methionine          | cystathionine to homocysteine                                  | <u>metC</u>      | 61,62,19    | --           | 103                |
| <u>metE</u>      | methionine          | homocysteine to methionine (grows on vitamin B <sub>12</sub> ) | <u>metE</u>      | 61,62,19    | --           | 123                |
| <u>metF</u>      | methionine          | homocysteine to methionine (reduction of folic acid)           |                  | 61,62,19    | --           | 128                |
| <u>metG</u>      | methionine          | homocysteine to methionine                                     |                  | 62          | --           | 67                 |
| <u>mot</u>       | motility            |                                                                |                  | 66          | --           | 55                 |
| <u>mtl</u>       | mannitol            | utilization                                                    | <u>mtl</u>       | --          | --           | 115                |
| <u>mut</u>       | mutator             | increases frequency of mutation                                |                  | 17,49       | --           | 135                |
| <u>nic</u>       | nicotinic acid      | requirement                                                    |                  | --          | --           | 22                 |
| <u>nml</u>       | N-methyl-lysine     | N-methyl-lysine in flagellar protein                           |                  | 66,65a      | --           | 55                 |
| <u>O5</u>        |                     | synthesis of O antigen 5                                       |                  | 66          | --           | 76                 |
| <u>P22</u>       |                     | PLT-22 prophage site                                           |                  | 63          | --           | 13                 |
| <u>P221</u>      |                     | PLT-221 prophage site                                          |                  | 78,80       | --           | 41                 |
| <u>panA</u>      | pantothenic acid    | ? to α-ketoisovaleric acid                                     | <u>pan</u>       | 17          | --           | 9                  |
| <u>panB</u>      | pantothenic acid    | α-ketoisovaleric acid to ketopantoic acid                      |                  | 17          | --           | 9                  |
| <u>panC</u>      | pantothenic acid    | pantoic acid to pantothenic acid                               |                  | 17          | --           | 9                  |
| <u>pdx</u>       | pyridoxine          | requirement                                                    |                  | --          | --           | 120                |
| <u>pgi</u>       |                     | phosphoglucosomerase                                           |                  | 64          | 23           | 130                |
| <u>phe</u>       | phenylalanine       | requirement                                                    | <u>pheA,B</u>    | 19,55       | --           | 88                 |
| <u>pig</u>       | pigment             | brownish colonies                                              |                  | 66          | --           | 81                 |
| <u>proA</u>      | proline             | glutamate to glutamic-γ-semialdehyde                           | <u>proA,B</u>    | 50          | --           | 12                 |
| <u>proB</u>      | proline             | glutamate to glutamic-γ-semialdehyde                           | <u>proA,B</u>    | 50          | --           | 12                 |
| <u>proC</u>      | proline             | glutamic-γ-semialdehyde to proline                             | <u>proC</u>      | 50          | --           | 12                 |
| <u>purA</u>      | purine <sup>†</sup> | adenylosuccinic synthetase (IMP to adenylo-succinate)          | <u>purA</u>      | 31,27,28,81 | 27,28,31     | 136                |
| <u>purB</u>      | purine              | adenylosuccinase                                               | <u>purB</u>      | 27,28,81,31 | 27,28,31     | 43                 |
| <u>purC,E</u>    | purine              | conversion of AIR to S-AICAR                                   | <u>purC,E</u>    | 18,30,81    | 30           | 79,19              |
| <u>purD,E,1</u>  | purine              | early block before AIR                                         | <u>purD</u>      | 29,81       | 29           | 129,79             |
| <u>purC</u>      | purine              | amidotransferase for FGAR to FGAM                              |                  | 29          | 9,29         | 80                 |
| <u>purH</u>      | purine              | AICAR transformylase                                           |                  | 29          | 29,56        | 129                |
| <u>pyrA</u>      | pyrimidine          | carbamate kinase (arginine + uracil requirement)               | <u>pyrA</u>      | 79          | 8*           | 2                  |
| <u>pyrB</u>      | pyrimidine          | aspartate transcarbamylase                                     | <u>pyrB</u>      | 79          | 8*           | 137                |
| <u>pyrC</u>      | pyrimidine          | dihydroorotase                                                 | <u>pyrC</u>      | 79          | 8*           | 42                 |
| <u>pyrD</u>      | pyrimidine          | dihydroorotic acid dehydrogenase                               | <u>pyrD</u>      | 79          | 8*           | 41                 |
| <u>pyrE</u>      | pyrimidine          | orotidylic acid pyrophosphorylase                              | <u>pyrE</u>      | 79,71*      | 8*           | 116                |
| <u>pyrF</u>      | pyrimidine          | orotidylic acid decarboxylase                                  | <u>pyrF</u>      | 79          | 8*           | 51                 |
| <u>rha</u>       | rhamnose            | utilization                                                    | <u>rha</u>       | 66          | --           | 127                |
| <u>rouA,B</u>    | rough               | reduced polysaccharide coat                                    |                  | 68          | 7,54, 52a    | 110,60             |
| <u>serA</u>      | serine or glycine   | 3-phosphoglycerate dehydrogenase                               | <u>serA</u>      | --          | 74           | 95                 |
| <u>serB</u>      | serine or glycine   | phosphoserine phosphatase                                      | <u>serB</u>      | 26          | 74           | 1                  |
| <u>strA</u>      | streptomycin        | high level resistance                                          | <u>str</u>       | 16          | --           | 108                |
| <u>strB</u>      | streptomycin        | low level resistance plus auxotrophy                           |                  | 16          | --           | 78                 |
| <u>su-leu500</u> |                     | suppressor of leucine 500                                      |                  | 52          | --           | 52                 |
| <u>thi</u>       | thiamine            | requirement                                                    | <u>thi</u>       | --          | --           | 129                |
| <u>thr</u>       | threonine           | aspartic acid to β-aspartyl phosphate                          | <u>thr</u>       | 26          | --           | 1                  |



TABLE 7—Continued

| Genetic symbols | Activity   | Homologous locus in |          | References   |     | Map position (min) |
|-----------------|------------|---------------------|----------|--------------|-----|--------------------|
|                 |            | <i>E. coli</i>      | Genetics | Biochemistry |     |                    |
| <u>thrC</u>     | threonine  |                     |          | 26           | --  | 1                  |
| <u>thrA</u>     | threonine  |                     |          | 26           | --  | 1                  |
|                 |            |                     |          |              |     |                    |
| <u>thrB</u>     | threonine  |                     |          | 26           | --  | 1                  |
| <u>thrE</u>     | threonine  |                     |          | 26           | --  | 120                |
| <u>thy</u>      | thymine    | <u>thy</u>          |          | 22           | --  | 91                 |
| <u>tre</u>      | trehalose  |                     |          | 69           | --  | 58                 |
| <u>tryO1</u>    | tryptophan |                     |          | 47, 52       | --  | 52                 |
| <u>tryA</u>     | tryptophan |                     |          | 5, 14        | 25* | 52                 |
| <u>tryB</u>     | tryptophan |                     |          | 5, 14        | 25* | 52                 |
| <u>tryO2</u>    | tryptophan |                     |          | 47, 52       | --  | 52                 |
| <u>tryC</u>     | tryptophan |                     |          | 5, 14        | 25* | 52                 |
| <u>tryD</u>     | tryptophan |                     |          | 5, 14        | 25* | 52                 |
| <u>tyr</u>      | tyrosine   |                     |          | 19, 55       | --  | 84                 |
| <u>wh2</u>      |            |                     |          | 35           | --  | 82                 |
| <u>xyl</u>      | xylose     | <u>xyl</u>          |          | --           | --  | 11‡                |

\* These studies were done with *E. coli*.

† The mutant *C-dg<sup>s</sup>*, studied by THEODORE and ENGLERBERG, is probably at the *asp* locus, for like *asp* it is jointly transduced at high frequency with *argA*.

‡ AICAR, aminoimidazolecarboxamide ribotide; AIR, aminoimidazole ribotide; AMP, adenosine-5'-phosphate; ATP, adenosine triphosphate; FGAM, formylglycinamide ribotide; FGAR, formylglycinamide ribotide; GMP, guanosine-5'-phosphate; IMP, inosine-5'-phosphate; S-AICAR, succinyl-aminoimidazolecarboxamide ribotide; XMP, xanthosine-5'-phosphate.

§ Mutants formerly called *ade* (adenine) and *adh* (adenine-thiamine) have been changed to *pur* (purine). This change was made because the requirement for thiamine has been shown to be a phenotypic manifestation which does not correlate with genotype. *purA*=*adeA*; *purB*=*adeB*; *purC*=*adeC*; *purD*=*adeD*, *adhD*; *purE*=*adeE*; *purF*=*adeF*; *purG*=*adhA*; *purH*=*adhB*; *purI*=*adhC*. The designation for guanine mutants (*gua*) is unchanged (Gots, unpublished).

*Confirmation of the linkage map:* The accuracy of the linkage map, constructed originally on the basis of the kinetic data shown in Tables 2 to 6 may be checked by four independent tests, described below.

(1) *Transduction tests*—(a) Loci in the same transducing fragment should be shown by kinetic tests to be closely linked. Nine transducing fragments that carry genes for unrelated functions were tested. These kinetic tests invariably demonstrated that loci of the same fragment were closely linked, being separated by one minute or less. (b) Loci that are demonstrated by kinetic studies to be widely separated should never be jointly transduced. Many such combinations were tested, and joint transduction was never observed.

Of these nine transducing fragments, three had been previously reported (*try-cysB*, DEMEREC and HARTMAN 1956; *ara-leu* and *serB-thr*, DEMEREC *et al.* 1958), while six were predicted from the completed conjugation map, and established by transduction tests carried out by the laboratory group of M. DEMEREC, according to methods described by GLANVILLE and DEMEREC (1960). The six newly identified transducing fragments are listed below. The numerals joining pairs of loci indicate the percentage of joint transduction. *cysA-guaA*, *B-purI*, *C, F* (order not known); *gly-40-purG*; *argB-20-thy-lys*; *thrE-42-pdx*; *metB, F-9-asp-70-argA, F, C, H*; *purD-metA-thi* (order not known).

HARTMAN, ROTH and AMES (1964) and ROTH (personal communication) observed that *hisR* transduced jointly at low frequency while *ile* (1.0%) and with *metE* (2.0%), but that *ile* and *metE* did not transduce jointly. The interpretation is that *ile* and *metE* are on two adjacent fragments which do not have fixed ends, with *hisR* in the overlapping region.

(2) *Hybridization tests*—An independent method of testing genetic linkage was devised by DEMEREC (1964). Hybrids are produced by conjugation between *S. typhimurium* as recipients and other species of Enterobacteriaceae as donors. Transduction analyses of these hybrids, with *S. typhimurium* auxotrophs as recipients, shows that the “foreign” genetic material of the donor parent usually gives rise to a lower frequency of recombination in *S. typhimurium*. Thus hybrids can serve, in a fashion similar to overlapping deletions, for genetic mapping of the bacterial chromosome. Results of a study involving hybrids from the cross *S. typhimurium* F<sup>-</sup> *cysC* × *E. coli* HfrC *cys*<sup>+</sup> (DEMEREC and OHTA 1964) have shown the following order of loci: *metC*—*argE*—*serA*—(*lys-argB*)—(*cysC-D-H-I-J*)—(*phe-tyr*)—*purG-gly*. (Parentheses indicate that the orientation of the group of loci is not known.) These data are consistent with the results of kinetic studies. They permit the ordering of several loci not resolved by conjugation.

(3) *Genetic recombination mediated by colicines*—SMITH and STOCKER (1962) have made genetic analyses of *S. typhimurium* by means of *col*-factor-mediated conjugation. When recombinants for different donor markers are selected, segments of donor chromosome of considerable size and representing every part are transmitted. The order of 16 loci as determined by this method (STOCKER, SMITH and SUBBAIAH 1963; SUBBAIAH and STOCKER unpublished) is as follows: *metA-mal-ara-leu-proA-gal-cysB-tryD-tre-his-purC-cysC-str-xyl-ile-rha*. This order is identical to that independently arrived at by the kinetic studies with Hfr strains. Eighteen additional loci, mapped by STOCKER and associates by the *col*-factor method but not checked by F-factor-mediated conjugation, are shown in square brackets in Figure 2.

(4) *Point of origin of donor strains*—Further support for the correctness of the order of loci derived by kinetic experiments was obtained from a study of the points of origin of five additional donor strains of *S. abony* (SH81, SH640, SH650, SH671, SW1403) provided by MÄKELÄ (1963, and unpublished). With the large number of genetic markers available to us, we were able to determine the points of origin more precisely than was DR. MÄKELÄ (see Figure 2). These strains, and the others shown in Figure 2, will be described in a later publication. For each donor it was established which group of loci entered first and which entered last. The point of origin was between these two groups. The order of loci deduced from kinetic studies was in each case consistent with the order indicated by the position of the point of origin, which was always located between two loci shown by kinetic results to be adjacent.

Six loci were mapped by determining their position in the gradient of recombination frequencies generated by each of the Hfr donors, without the use of kinetic experiments. These loci were *lysB*, *aroE*, *malA*, *cysE*, *mtl*, and *pyrE*.

*Rates of entry of different Hfr strains:* A comparison of the results obtained with HfrB2 and HfrB3 indicates that the entry time for the same map interval is very similar in the two Hfr strains, which have opposite polarity but cover the same proximal region. The data for times of entry of the six gene loci that were tested with both strains (see Tables 3 and 4) are summarized in Table 8. The relative order of genes indicated by the two sets of tests is identical, and the time intervals between loci differ very little.

TABLE 8

*Times of entry, in minutes, of markers transferred by both HfrB2 and HfrB3.  
Time intervals between loci are shown in parentheses*

| Donor strain | <i>aroD</i> | <i>purG</i> | <i>tyr</i> | <i>cysC</i> | <i>serA</i> | <i>argE</i> |
|--------------|-------------|-------------|------------|-------------|-------------|-------------|
| HfrB2        | 23          | 28          | 34         | 40          | 45          | 52          |
|              | (5)         | (6)         | (6)        | (5)         | (7)         |             |
| HfrB3        | 39          | 32          | 29         | 23          | 18          | 13          |
|              | (7)         | (3)         | (6)        | (5)         | (5)         |             |

## DISCUSSION

Enough material is now available for an examination of homology of gene order between *E. coli* (TAYLOR and THOMAN 1964) and *S. typhimurium*. Of the 100 loci shown in the *E. coli* map and 133 on the *S. typhimurium* map, 59 have been sufficiently well analyzed in both organisms to justify the assumption that they are homologous. All of these seem to have identical order on the two maps, and among the other loci only one case of divergence has so far been indicated. This divergence occurs in the chromosomal region concerned with lactose fermentation, which constitutes one of the taxonomic differences between *E. coli* and *S. typhimurium*, *E. coli* being a fermenter and *S. typhimurium* a nonfermenter. Weakly *lac*<sup>+</sup> strains have been isolated in Salmonellae (SCHÄFLER and MINTZER 1959; SCHÄFLER, MINTZER and SCHÄFLER 1960), but since the *lac* loci of *E. coli* function normally after transfer into *S. typhimurium* by conjugation, it is probable that these weak *lac*<sup>+</sup> strains represent mutations at other loci. SCHWARTZ (1964) presented evidence that in *E. coli* the gene order in the *lac* section of the linkage map is *proA*-(2 min)-*proB-lac-proC*-(5 min)-*purE*. Except for *lac*, the gene order and distances between genes are similar in Salmonella, and by means of *S. typhimurium* × *E. coli* crosses *lac*<sup>+</sup> can be introduced between *proB* and *proC*. It has been suggested (MIYAKE and DEMEREC 1960) that in *S. typhimurium* the *lac* locus has been deleted.

In a few other regions divergence is being investigated. A mutant allele of *E. coli* with the same nutritional phenotype as the *cysA* locus of *S. typhimurium* maps in the same region as the *cysE* locus of *S. typhimurium* (TAYLOR and THOMAN 1964), but since further tests of this allele have shown that it is not biochemically homologous to *cysA* (MONTY unpublished), it does not represent a demonstration of divergence. Differences between the two organisms are seen with respect to map locations of *aro* and *fim* loci, but it is likely that only some of the *aro* and *fim* loci have been mapped in each species and that the mapped loci do not happen to correspond. MÄKELÄ (1964) found that the gene *H1* for the phase-1 flagellar antigen of *S. abony* is allelic to *H*, the gene for the only flagellar antigen of *E. coli*, while the *S. abony* gene *H2* has no counterpart in *E. coli*.

One of the first steps in evolutionary differentiation, as observed in studies of higher organisms, is the appearance of chromosomal rearrangements, particularly inversions. Therefore, the similarity of gene order so far detected between *S. typhimurium* and *E. coli* is highly unexpected. It has been proposed (DEMEREC

1965) that the responsible factor is the frequent clustering of functionally related genes found in both genera. In order to persist, a gene cluster must offer selective advantage to the organism; thus changes in chromosomal structure that could break a cluster would be disadvantageous to the organism, and would be selected against. The presence of a large number of clusters in a genome would very effectively preserve the existing gene arrangement; and if the evolutionary progenitor of *Salmonella* and *Escherichia* possessed such clusters, a high degree of similarity in the gene arrangements of these two bacteria would be expected.

The similarity of the gross genetic maps of *Salmonella* and *Escherichia* indicates a close relationship, which is confirmed by the isolation of *S. typhimurium*—*E. coli* hybrids (BARON, CAREY and SPILMAN 1958; DEMEREC *et al.* 1959; ZINDER 1960a). Transduction analyses of such hybrids reveal that the recombination homology between *S. typhimurium* and *E. coli* genetic material within the *cysC* region is only about 1% (DEMEREC and OHTA 1964). It has been suggested that this surprisingly low homology may be due to differences in base sequence of loci that control functionally similar proteins because of (1) degeneracy of the code, and hence the use of different triplets to code particular amino acids, or (2) different amino acid sequences in proteins having the same function.

The map length of *S. typhimurium* is 138 minutes, whereas that of *E. coli* is 89 minutes, only 64% as long. The lengths of 9 map intervals in *E. coli* vary from 39 to 116% of the corresponding intervals in *S. typhimurium* (Table 9). JOHNSON, FALKOW and BARON (1964) also observed longer map intervals in *Salmonella* but they reported the *E. coli*/*Salmonella* map lengths for the *ile-metA-proA* intervals to be constant at about 63%, whereas we found 114% and 65% for *ile-metA* and *metA-proA* respectively. They point out that their finding of longer map intervals in experiments with HfrA (SR305) may have been due to differences in mating method, for they did not start matings on Millipore filters and consequently obtained a lower frequency of mating.

Because of the close similarity of the *S. typhimurium* and *E. coli* linkage maps, the greater total map length of *S. typhimurium* is considered to be the result of

TABLE 9

*Relative lengths of map intervals in minutes*

| Interval         | <i>E. coli</i> | <i>S. typhimurium</i> | <i>E. coli/S. typhimurium</i> |
|------------------|----------------|-----------------------|-------------------------------|
| <i>ile-metA</i>  | 8              | 7                     | 1.14                          |
| <i>metA-proA</i> | 15             | 23                    | .65                           |
| <i>proA-purE</i> | 5              | 6                     | .83                           |
| <i>purE-pyrC</i> | 9              | 23                    | .39                           |
| <i>pyrC-try</i>  | 4              | 10                    | .40                           |
| <i>try-his</i>   | 14             | 12                    | 1.16                          |
| <i>his-serA</i>  | 18             | 30                    | .60                           |
| <i>serA-argG</i> | 8              | 13                    | .61                           |
| <i>argG-ile</i>  | 8              | 14                    | .57                           |
| Total            | 89             | 138                   | .64                           |

slower rate of entry rather than greater physical length of the *S. typhimurium* genetic material. Many Hfr strains of *E. coli* and *S. typhimurium* produce "two slope" kinetic data, because they contain two populations with different speeds of entry; the *E. coli* map (TAYLOR and THOMAN 1964) is based on the first slope, the *S. typhimurium* map on the second. Part of the difference in length can be attributed to this fact, but not all, as is shown by instances in which map intervals based on the first slope can be measured in *S. typhimurium*.

The variations in relative *E. coli*/*S. typhimurium* map distances (Table 9) are thought to be due to variations in rate of entry of the different Hfr strains used to determine the different map intervals in the two bacteria. Differences in length of the genetic material in these map intervals would also explain the data.

The number of transducing fragments carrying known genes is estimated from Figure 2 to be 40 to 60. A range must be given because not all loci shown to be closely linked have been tested for joint transduction. Time intervals between loci in the same transducing fragment (for example, *try cysB*, *serB thr*, *ara leu*) are less than one minute. The total number of transducing fragments is estimated as approximately 100 to 150.

The authors gratefully acknowledge the assistance of Mr. C. H. HALL, Miss NORIKO OHTA, Miss MARIE ST. PIERRE and Mr. LOUIS GLATZER in experimental work, and Miss AGNES C. FISHER for editing the manuscript. They also acknowledge other investigators who supplied details of unpublished mapping results and provided strains.

#### SUMMARY

This paper presents a circular linkage map of *S. typhimurium*, 138 minutes in length and containing 133 gene loci, which incorporates all the information we have from experiments done in our laboratory and in others. Key points and many intermediate points were established by interrupted conjugation between recipients and five Hfr strains of *S. typhimurium*. Positions of other markers were determined by transduction, *col*-factor-mediated conjugation, or hybridization. A recently published linkage map of *Escherichia coli* (TAYLOR and THOMAN 1964) contains 100 genes and is 89 minutes long. Studies of 59 loci that are mapped in both organisms have been sufficiently thorough to permit the conclusion that these loci have the same function in *S. typhimurium* and *E. coli*. On the maps all 59 are located in similar positions. Only one case of gene divergence is suggested; the *lac* loci of *E. coli* may be missing from *S. typhimurium*. These findings indicate a high degree of homology in gross genetic structure. The number of transducing fragments carrying identified genes is estimated as 40 to 60.

#### LITERATURE CITED

(Numbers are for purposes of reference in Table 7).

1. AMES, B. N., and P. E. HARTMAN, 1963 The histidine operon. Cold Spring Harbor Symp. Quant. Biol. **24**: 349-356.
2. AMES, B. N., P. E. HARTMAN, and F. JACOB, 1963 Chromosomal alterations affecting the regulation of histidine biosynthetic enzymes in Salmonella. J. Mol. Biol. **7**: 23-42.

3. ARMSTRONG, F. B., and R. P. WAGNER, 1964 Isoleucine-valine requiring mutants of *Salmonella typhimurium*. *Genetics* **50**: 957-965.
4. BACK, K. J. C., and E. G. WESTAWAY, 1962 Studies on a mutant strain of *Escherichia coli* which requires both methionine and lysine for growth. *J. Gen. Microbiol.* **27**: 41-50.
5. BALBINDER, E., 1962 The fine structure of the loci *tryC* and *tryD* of *Salmonella typhimurium*. I. Determination of the order of mutational sites by three-point transduction tests. *Genetics* **47**: 469-482.
6. BARON, L. S., W. F. CAREY, and W. M. SPILMAN, 1958 Hybridization of *Salmonella* species by mating with *Escherichia coli*. (Abstr.) Proc. 7th Intern. Congr. Microbiol., p. 50.
7. BECKMANN, I., T. V. SUBBAIAH, and B. A. D. STOCKER, 1964 Rough mutants of *Salmonella typhimurium*. II. Serological and chemical investigations. *Nature* **201**: 1299-1301.
8. BECKWITH, J. R., A. B. PARDEE, R. AUSTRIAN, and F. JACOB, 1962 Coordination of the synthesis of the enzymes in the pyrimidine pathway of *E. coli*. *J. Mol. Biol.* **5**: 618-634.
9. BUCHANAN, J. M. *Personal communication* through J. S. Gots.
10. BURNS, R. O., H. E. UMBARGER, and S. R. GROSS, 1963 The biosynthesis of leucine. III. The conversion of  $\alpha$ -hydroxy- $\beta$ -carboxyisocaproate to  $\alpha$ -ketoisocaproate. *Biochemistry* **2**: 1053-1058.
11. DEMEREC, M., 1964 Organization of genetic material in *Salmonella*. *Erwin-Baur Gedächtnisvorlesungen* **3**: 51-56.
12. ———, 1965 Homology and divergence in genetic material of *Salmonella typhimurium* and *Escherichia coli*. pp. 505-510. *Evolving Genes and Proteins*. Edited by V. BRYSON and H. J. VOGEL. Academic Press, New York.
13. DEMEREC, M., D. H. GILLESPIE, and K. MIZOBUCHI, 1963 Genetic structure of the *cysC* region of the *Salmonella* genome. *Genetics* **48**: 997-1009.
14. DEMEREC, M., and Z. HARTMAN, 1956 Tryptophan mutants in *Salmonella typhimurium*. *Carnegie Inst. Wash. Publ.* **612**: 5-33.
15. DEMEREC, M., E. L. LAHR, T. MIYAKE, I. GOLDMAN, E. BALBINDER, S. BANIČ, K. HASHIMOTO, E. V. GLANVILLE, and J. D. GROSS, 1958 Bacterial genetics. *Carnegie Inst. Wash. Yearbook* **57**: 390-406.
16. DEMEREC, M., E. L. LAHR, E. BALBINDER, T. MIYAKE, J. ISHIDSU, K. MIZOBUCHI, and B. MAHLER, 1960 Bacterial genetics. *Carnegie Inst. Wash. Yearbook* **59**: 426-441.
17. DEMEREC, M., E. L. LAHR, E. BALBINDER, T. MIYAKE, C. MACK, D. MACKAY, and J. ISHIDSU, 1959 Bacterial genetics. *Carnegie Inst. Wash. Yearbook* **58**: 433-439.
18. DEMEREC, M., E. L. LAHR, H. OZEKI, I. GOLDMAN, S. HOWARTH, and B. DJORDJEVIĆ, 1957 Bacterial genetics. *Carnegie Inst. Wash. Yearbook* **56**: 368-376.
19. DEMEREC, M., H. MOSER, R. C. CLOWES, E. L. LAHR, H. OZEKI, and W. VIEMETTER, 1956 Bacterial genetics. *Carnegie Inst. Wash. Yearbook* **55**: 301-315.
20. DEMEREC, M., and N. OHTA, 1964 Genetic analyses of *Salmonella typhimurium*  $\times$  *Escherichia coli* hybrids. *Proc. Natl. Acad. Sci. U.S.* **52**: 317-323.
21. DREYFUSS, J., and K. J. MONTY, 1963 The biochemical characterization of cysteine-requiring mutants of *Salmonella typhimurium*. *J. Biol. Chem.* **238**: 1019-1024.
- 21a. DREYFUSS, J., 1964 Characterization of a sulfate- and thiosulfate-transporting system in *Salmonella typhimurium*. *J. Biol. Chem.* **239**: 2292-2297.
22. EISENSTARK, A. *Personal communication*.
23. FRAENKEL, D., M. J. OSBORN, B. L. HORECKER, and S. M. SMITH, 1963 Metabolism and cell wall structure of a mutant of *Salmonella typhimurium* deficient in phosphoglucose isomerase. *Biochem. Biophys. Res. Commun.* **11**: 423-428.

24. FUKASAWA, T., and H. NIKAIDO, 1961 Galactose mutants of *Salmonella typhimurium*. *Genetics* **46**: 1295-1303.
25. GIBSON, F., and C. YANOFSKY, 1960 The partial purification and properties of indole-3-glycerol phosphate synthetase from *Escherichia coli*. *Biochim. Biophys. Acta* **43**: 489-500.
26. GLANVILLE, E. V., and M. DEMEREC, 1960 Threonine, isoleucine and isoleucine-valine mutants of *Salmonella typhimurium*. *Genetics* **45**: 1359-1374.
27. GOLLUB, E. G., and J. S. GOTS, 1959 Purine metabolism in bacteria. VI. Accumulations by mutants lacking adenylosucc.nase. *J. Bacteriol.* **78**: 320-325.
28. ———, 1961 Genetic and biochemical analysis of adenine-specific auxotrophs of *Salmonella typhimurium*. (Abstr.) *Bacteriol. Proc.*, p. 185.
29. GOTS, J. S. *Personal communication*.
30. GOTS, J. S., R. G. COON, and D. H. HILD, 1959 Cistronic control of biosynthetic leakage in purine auxotrophs of *Salmonella typhimurium*. (Abstr.) *Bacteriol. Proc.*, p. 35.
31. GOTS, J. S., and E. G. GOLLUB, 1957 Sequential blockade in adenine biosynthesis by genetic loss of an apparent bifunctional deacylase. *Proc. Natl. Acad. Sci. U.S.* **43**: 826-834.
32. GROSS, S. R., R. O. BURNS, and H. E. UMBARGER, 1963 The biosynthesis of leucine. II. The enzymic isomerization of  $\beta$ -carboxy- $\beta$ -hydroxyisocaproate and  $\alpha$ -hydroxy- $\beta$ -carboxyisocaproate. *Biochemistry* **2**: 1046-1052.
33. HARTMAN, P. E., J. C. LOPER, and D. ŠERMAN, 1960 Fine structure mapping by complete transduction between histidine-requiring *Salmonella* mutants. *J. Gen. Microbiol.* **22**: 323-353.
34. HARTMAN, P. E., J. ROTH, and B. N. AMES, 1964 Mutants of *Salmonella typhimurium* derepressed for the histidine biosynthetic enzymes. (Abstr.) *Bacteriol. Proc.*, p. 18.
35. IINO, T., 1961 A stabilizer of antigenic phases in *Salmonella abortus-equi*. *Genetics* **46**: 1465-1469.
36. ———, 1961 Genetic analysis of O-H variation in *Salmonella*. *Japan. J. Genetics* **36**: 268-275.
37. ———, 1962 Phase specific regulator of flagellar genes (*H1* and *H2*) in *Salmonella*. *Natl. Inst. Genetics (Misima, Japan) Annual Report* **13**: 72-73.
38. JACOB, F., and E. L. WOLLMAN, 1961 *Sexuality and the Genetics of Bacteria*. Academic Press, New York.
39. JOHNSON, E. M., S. FALKOW, and L. S. BARON, 1964 Chromosome transfer kinetics of *Salmonella* Hfr strains. *J. Bacteriol.* **88**: 395-400.
40. JUNGWIRTH, C., S. R. GROSS, P. MARGOLIN, and H. E. UMBARGER, 1963 The biosynthesis of leucine. I. The accumulation of  $\beta$ -carboxy- $\beta$ -hydroxyisocaproate by leucine auxotrophs of *Salmonella typhimurium* and *Neurospora crassa*. *Biochemistry* **2**: 1-6.
41. LEDERBERG, J., and T. IINO, 1956 Phase variation in *Salmonella*. *Genetics* **41**: 743-757.
42. LEE, N., and E. ENGBERG, 1962 Dual effects of structural genes in *Escherichia coli*. *Proc. Natl. Acad. Sci. U.S.* **48**: 335-348.
43. LEINWEBER, F.-J., and K. J. MONTY, 1963 The metabolism of thiosulfate in *Salmonella typhimurium*. *J. Biol. Chem.* **238**: 3775-3780.
44. LOPER, J. C., M. GRABNAR, R. C. STAHL, Z. HARTMAN, and P. E. HARTMAN, 1964 Genes and proteins involved in histidine biosynthesis in *Salmonella*. *Brookhaven Symp. Biol.* **17**: 15-52.
45. MÄKELÄ, P. H., 1963 Hfr males in *Salmonella abony*. *Genetics* **48**: 423-429.
- 45a. ———, 1964 Genetic homologies between flagellar antigens of *Escherichia coli* and *Salmonella abony*. *J. Gen. Microbiol.* **35**: 503-510.

46. MARGOLIN, P., 1963 Genetic fine structure of the leucine operon in *Salmonella*. *Genetics* **48**: 441-457.
47. MARGOLIN, P., F. H. MUKAI, 1964 Evidence for two operons in the tryptophan gene cluster in *Salmonella typhimurium*. (Abstr.) *Bacteriol. Proc.*, pp. 87-88.
48. MATNEY, T. S., and N. E. ACHENBACH, 1962 A comment on the fertility of F<sub>2</sub> donor types of *Escherichia coli* K-12. *Biochem. Biophys. Res. Commun.* **9**: 285-287.
- 48a. McDONOUGH, M. W., 1964 Chemical studies on flagellins of some naturally occurring and mutant *Salmonella* flagellar antigens. (Abstr.) *Proc. 6th Intern. Biochem. Congr.*, p. 169.
49. MIYAKE, T., 1960 Mutator factor in *Salmonella typhimurium*. *Genetics* **45**: 11-14.
50. MIYAKE, T., and M. DEMEREC, 1960 Proline mutants of *Salmonella typhimurium*. *Genetics* **45**: 755-762.
51. MIZOBUCHI, K., M. DEMEREC, and D. H. GILLESPIE, 1962 Cysteine mutants of *Salmonella typhimurium*. *Genetics* **47**: 1617-1627.
52. MUKAI, F. H., and P. MARGOLIN, 1963 Analysis of unlinked suppressors of an O<sup>o</sup> mutation in *Salmonella*. *Proc. Natl. Acad. Sci. U.S.* **50**: 140-148.
- 52a. NAIDE, Y., H. NIKAIIDO, P. H. MÄKELÄ, R. G. WILKINSON, and B. A. D. STOCKER, 1965 Semirough strains of *Salmonella*. *Proc. Natl. Acad. Sci. U.S.* **53**: 147-153.
53. NIKAIIDO, H., and T. FUKASAWA, 1961 The effect of mutation in a structural gene on the inducibility of the enzymes controlled by other genes of the same operon. *Biochem. Biophys. Res. Commun.* **4**: 338-342.
54. NIKAIIDO, H., K. NIKAIIDO, T. V. SUBBAIAH, and B. A. D. STOCKER, 1964 Rough mutants of *Salmonella typhimurium*. III. Enzymatic synthesis of nucleotide-sugar compounds. *Nature* **201**: 1301-1302.
55. NISHIOKA, Y., and M. DEMEREC. *Personal communication*.
56. OTTOLENGHI, A., and J. S. GOTS. *Personal communication*.
57. ROTH, J. *Personal communication*.
- 57a. SCHÄFLER, S., and L. MINTZER, 1959 Acquisition of lactose-fermenting properties by *Salmonellae*. I. Interrelationship between the fermentation of cellobiose and lactose. *J. Bacteriol.* **78**: 159-163.
- 57b. SCHÄFLER, S., L. MINTZER, and C. SCHÄFLER, 1960 Acquisition of lactose-fermenting properties by *Salmonellae*. II. Role of the medium. *J. Bacteriol.* **79**: 203-212.
58. SCHWARTZ, N. M., 1964 Suppression of a *lac* O<sup>o</sup> mutation in *Escherichia coli*. *J. Bacteriol.* **88**: 996-1001.
59. SIEGEL, L. M., E. M. CLICK, and K. J. MONTY, 1964 Evidence for a two-step electron flow from TPNH to sulfite and hydroxylamine in extracts of *Salmonella typhimurium*. *Biochem. Biophys. Res. Commun.* **17**: 125-129.
60. SIEGEL, L. M., and K. J. MONTY, 1964 Kinetic properties of the TPNH-specific sulfite and hydroxylamine reductase of *Salmonella typhimurium*. *Biochem. Biophys. Res. Commun.* **17**: 201-205.
61. SMITH, D. A., 1961 Some aspects of the genetics of methionineless mutants of *Salmonella typhimurium*. *J. Gen. Microbiol.* **24**: 335-353.
62. SMITH, D. A., and J. D. CHILDS, 1963 Further studies with methionine mutants of *Salmonella typhimurium* LT-2. (Abstr.) *Proc. 11th Intern. Genet. Congr.* **1**: 38.
63. SMITH, S. M., 1963a Mapping of prophage P22 in *Salmonella typhimurium*. *Microbial Genet. Bull.* **19**: 21.



64. ———, 1963b A mutant unable to ferment certain hexoses. *Microbial Genet. Bull.* **19**: 22.
65. SMITH, S. M., and B. A. D. STOCKER, 1962 Colicinogeny and recombination. *Brit. Med. Bull.* **18**: 46–51.
- 65a. STOCKER, B. A. D., M. W. McDONOUGH, and R. P. AMBLER, 1961 A gene determining presence or absence of  $\epsilon$ -N-methyl-lysine in *Salmonella* flagellar protein. *Nature* **189**: 556–558.
66. STOCKER, B. A. D., S. M. SMITH, and T. V. SUBBIAH, 1963 Mapping in *Salmonella typhimurium* with colicine factors to obtain fertility. *Microbial Genet. Bull.* **19**: 22–24.
67. STOCKER, B. A. D., N. D. ZINDER, and J. LEDERBERG, 1953 Transduction of flagellar characters in *Salmonella*. *J. Gen. Microbiol.* **9**: 410–433.
68. SUBBIAH, T. V., and B. A. D. STOCKER, 1964 Rough mutants of *Salmonella typhimurium*. I. Genetics. *Nature* **201**: 1298–1299.
69. ———. *Personal communication.*
70. TAYLOR, A. L., and E. A. ADELBERG, 1960 Linkage analysis with very high frequency males of *Escherichia coli*. *Genetics* **45**: 1233–1243.
71. TAYLOR, A. L., J. R. BECKWITH, A. B. PARDEE, R. AUSTRIAN, and F. JACOB, 1964 The chromosomal location of the structural gene for orotidylic acid pyrophosphorylase in *Escherichia coli*. *J. Mol. Biol.* **8**: 771.
72. TAYLOR, A. L., and M. S. THOMAN, 1964 The genetic map of *Escherichia coli* K-12. *Genetics* **50**: 659–677.
73. THEODORE, T. S., and E. ENGLERBERG, 1964 Mutant of *Salmonella typhimurium* deficient in the carbon dioxide-fixing enzyme phosphoenolpyruvic carboxylase. *J. Bacteriol.* **88**: 946–955.
74. UMBARGER, H. E., M. A. UMBARGER, and P. M. L. SUI, 1963 Biosynthesis of serine in *Escherichia coli* and *Salmonella typhimurium*. *J. Bacteriol.* **85**: 1431–1439.
75. VOGEL, H. J., D. F. BACON, and A. BAICH, 1963 Induction of acetyl-ornithine  $\delta$ -transaminase during pathway-wide repression. pp. 293–300. *Informational Macromolecules*. Edited by H. J. VOGEL, V. BRYSON, and J. O. LAMPEN. Academic Press, New York.
76. WAGNER, R. P., and A. BERGQUIST, 1960 Nature of the genetic blocks in the isoleucine-valine mutants of *Salmonella*. *Genetics* **45**: 1375–1386.
77. WOLLMAN, E. L., F. JACOB, and W. HAYES, 1956 Conjugation and genetic recombination in *Escherichia coli* K-12. *Cold Spring Harbor Symp. Quant. Biol.* **21**: 141–161.
78. YAMOMOTO, N., and T. F. ANDERSON, 1961 Genomic masking and recombination between serologically unrelated phages P22 and P221. *Virology* **14**: 430–439.
79. YAN, Y., and M. DEMEREC. *Personal communication.*
80. YOUNG, B. G. *Personal communication.*
81. YURA, T., 1956 Evidence of nonidentical alleles in purine-requiring mutants of *Salmonella typhimurium*. *Carnegie Inst. Wash. Publ.* **612**: 63–75.
82. ZINDER, N. D., 1960a Hybrids of *Escherichia* and *Salmonella*. *Science* **131**: 813–815.
83. ———, 1960b Sexuality and mating in *Salmonella*. *Science* **131**: 924–926.
